# Supplementary material for: Potential of the Burkholderia cepacia Complex to Produce 4-Hydroxy-3-Methyl-2-Alkyquinolines
Source: PubMed Central journal article supplement (PMC6403149; doi:10.3389/fcimb.2019.00033), 2019-02-28
Supplement: Data_Sheet_1.pdf [file Data_Sheet_1.pdf]

*Supplementary Material*

**Potential of the *Burkholderia cepacia* complex to produce 4-hydroxy-3-methyl-2-alkyquinolines**

**Pauline ML Coulon<sup>1</sup>, Marie-Christine Groleau<sup>1</sup> and Eric Déziel\***

<sup>1</sup>INRS - Institut Armand Frappier, Laval, Québec, Canada

**\* Correspondence:**

Eric Déziel

eric.deziel@iaf.inrs.ca

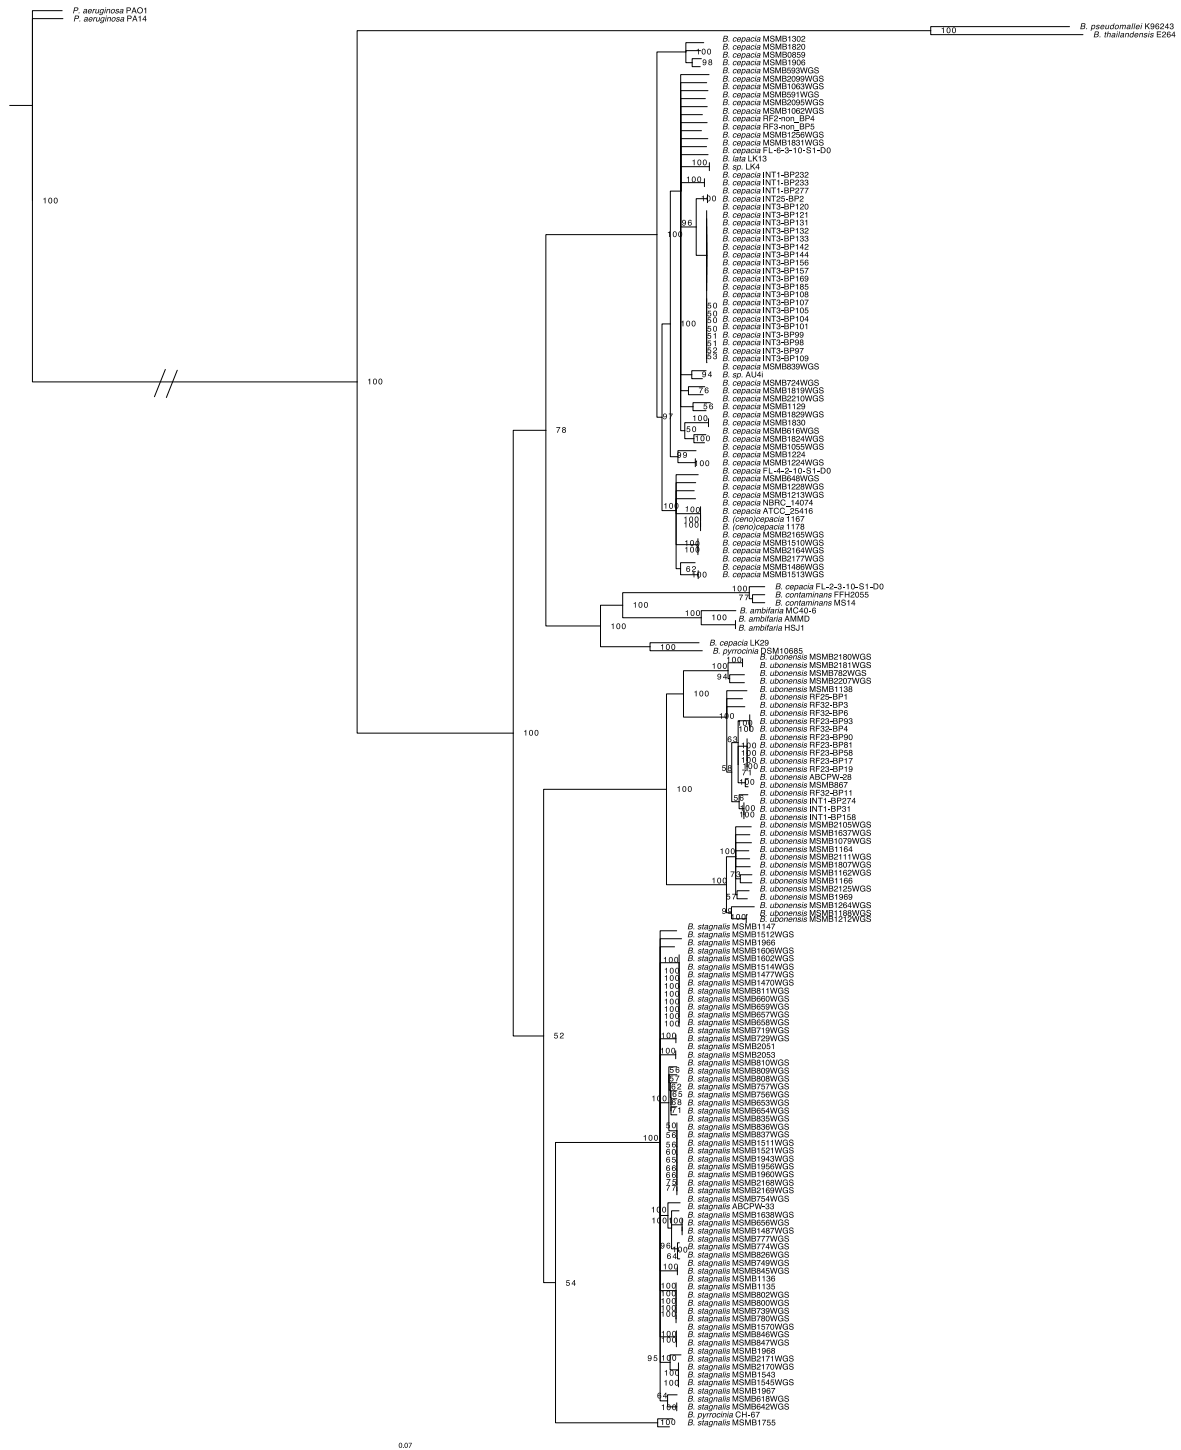

**Supplementary Figure 1.** Phylogenetic tree of strains of *Burkholderia* and the related species *P. aeruginosa* was generated in Mr Bayes based on the nucleic acids sequence of the complete *hmqABCDEFG* operon. A BLAST was run from *B. ambifaria* AMMD genome. The sequences were aligned by MUSCLE before analyzes by Mr.Bayes using the quick start settings on 9.000.000 generations. The p-value of the branches split was approximately 0.03.

**Supplementary Table 1. Nucleotide identify of the *hmqABCDEFG* operon in Bcc, *B. pseudomallei* and *B. thailandensis*.** Nucleotide identities are the average for each gene within the same species compared to the sequences of *B. ambifaria* AMMD. \*The *hmqF* sequence was split (1-1754 bp and 1699-3819 bp) to be able to run the BLAST analysis on Burkholderia DB. These *hmqF* sequence fragments are overlapping, to be sure that both BLAST analyses have a part of the sequence in common.

| Species                                          | Number of genomes per species | Average nucleic identity (%) ± STDEV |                       |                      |                      |                      |                         |              | <i>hmqG</i> (2139 bp) |
|--------------------------------------------------|-------------------------------|--------------------------------------|-----------------------|----------------------|----------------------|----------------------|-------------------------|--------------|-----------------------|
|                                                  |                               | <i>hmqA</i> (1656 bp)                | <i>hmqB</i> (1116 bp) | <i>hmqC</i> (888 bp) | <i>hmqD</i> (999 bp) | <i>hmqE</i> (897 bp) | <i>hmqF</i> * (3819 bp) |              |                       |
|                                                  |                               |                                      |                       |                      |                      |                      | 1-1754 bp               | 1699-3819 bp |                       |
| <i>Burkholderia cepacia</i> (genomovar I)        | 77                            | 91.3 ± 0.4                           | 89.9 ± 0.9            | 92.3 ± 0.4           | 92.0 ± 0.6           | 92.4 ± 0.3           | 90.6 ± 0.7              | 89.6 ± 0.7   | 91.5 ± 0.7            |
| <i>Burkholderia multivorans</i> (genomovar II)   | -                             | -                                    | -                     | -                    | -                    | -                    | -                       | -            | -                     |
| <i>Burkholderia cenocepacia</i> (genomovar III)  | -                             | -                                    | -                     | -                    | -                    | -                    | -                       | -            | -                     |
| <i>Burkholderia stabilis</i> (genomovar IV)      | -                             | -                                    | -                     | -                    | -                    | -                    | -                       | -            | -                     |
| <i>Burkholderia vietnamiensis</i> (genomovar V)  | -                             | -                                    | -                     | -                    | -                    | -                    | -                       | -            | -                     |
| <i>Burkholderia dolosa</i> (genomovar VI)        | -                             | -                                    | -                     | -                    | -                    | -                    | -                       | -            | -                     |
| <i>Burkholderia ambifaria</i> (genomovar VII)    | 3                             | 99.5 ± 0.9                           | 99.4 ± 1.0            | 99.3 ± 1.2           | 99.2 ± 1.4           | 99.7 ± 0.9           | 99.6 ± 0.7              | 99.5 ± 0.9   | 99.1 ± 1.5            |
| <i>Burkholderia anthina</i> (genomovar VIII)     | -                             | -                                    | -                     | -                    | -                    | -                    | -                       | -            | -                     |
| <i>Burkholderia pyrrocinia</i> (genomovar IX)    | 3                             | 93.2 ± 0.6                           | 93.1 ± 2.1            | 93.9 ± 1.2           | 93.8 ± 1.8           | 93.7 ± 0.9           | 91.3 ± 2.3              | 90.6 ± 2.8   | 92.4 ± 1.5            |
| <i>Burkholderia ubonensis</i> (genomovar X)      | 283                           | 88 ± 0.2                             | 90.2 ± 0.2            | 91.6 ± 0.3           | 93.8 ± 0.2           | 90.2 ± 0.3           | 89.5 ± 2.8              | 87.7 ± 2.6   | 90.2 ± 0.2            |
| <i>Burkholderia cepacia</i> complex (Bcc)        |                               |                                      |                       |                      |                      |                      |                         |              |                       |
| <i>Burkholderia latens</i> (BCC1)                | -                             | -                                    | -                     | -                    | -                    | -                    | -                       | -            | -                     |
| <i>Burkholderia diffusa</i> (BCC2)               | -                             | -                                    | -                     | -                    | -                    | -                    | -                       | -            | -                     |
| <i>Burkholderia arboris</i> (BCC3)               | -                             | -                                    | -                     | -                    | -                    | -                    | -                       | -            | -                     |
| <i>Burkholderia seminalis</i> (BCC7)             | -                             | -                                    | -                     | -                    | -                    | -                    | -                       | -            | -                     |
| <i>Burkholderia metallica</i> (BCC8)             | -                             | -                                    | -                     | -                    | -                    | -                    | -                       | -            | -                     |
| <i>Burkholderia lata</i> (group K)               | 2                             | 91.6 ± 1.0                           | 90.5 ± 2.4            | 92.4 ± 0.1           | 93.3 ± 2.6           | 92.8 ± 0.7           | 92.8 ± 4.1              | 90.8 ± 1.8   | 92.5 ± 1.4            |
| <i>Burkholderia contaminans</i> (group K. BCCAT) | 3                             | 92.6 ± 0.2                           | 91.6 ± 0.4            | 92.9 ± 0.3           | 94.7 ± 0.2           | 93.5 ± 0.4           | 95.6 ± 0.2              | 91.7 ± 0.1   | 93.7 ± 0.1            |
| <i>Burkholderia pseudomultivorans</i>            | -                             | -                                    | -                     | -                    | -                    | -                    | -                       | -            | -                     |
| <i>Burkholderia stagnalis</i> (BCC B)            | 63                            | 92.1 ± 0.1                           | 90.0 ± 0.2            | 92.9 ± 0.3           | 92.5 ± 0.1           | 92.4 ± 0.3           | 89.9 ± 0.2              | 89.0 ± 0.1   | 91.0 ± 0.2            |
| <i>Burkholderia territorii</i> (BCC L)           | 2                             | 90.5 ± 0                             | 88.6 ± 0              | 92.3 ± 0             | 91.3 ± 0             | 92.1 ± 0             | 89.9 ± 0                | 89.8 ± 0     | 88.4 ± 0              |
| <i>Burkholderia paludis</i>                      |                               |                                      |                       |                      |                      |                      |                         |              |                       |
| <i>Burkholderia</i> sp.                          | 11                            | 81.5 ± 8.8                           | 82.4 ± 8.3            | 84.2 ± 7.2           | 87.2 ± 5.8           | 82.6 ± 8.7           | 81.4 ± 7.8              | 82.2 ± 6.4   | 81.6 ± 7.4            |
| <i>B. pseudomallei</i>                           | 655                           | 77.4 ± 0.1                           | 82.3 ± 0.4            | 80.7 ± 0.1           | 83.8 ± 0.1           | 77.1 ± 0.2           | 76.3 ± 0.1              | 77.9 ± 0.1   | 77.0 ± 0.1            |
| <i>B. thailandensis</i>                          | 22                            | 77.9 ± 0.2                           | 82.9 ± 0.5            | 80.8 ± 0.1           | 84.7 ± 0             | 76.7 ± 0.6           | 76.2 ± 0.1              | 77.9 ± 0.2   | 76.5 ± 0.2            |
